# Supplementary material for: Lithium mitigates hippocampal tau pathology in a rodent model of traumatic brain injury
Source: Research Square preprint supplement (doi:10.21203/rs.3.rs-7069449/v1), 2025-08-12
Supplement: Supplementary file 1 [file fbfba151c44f278650a6627f.pdf]

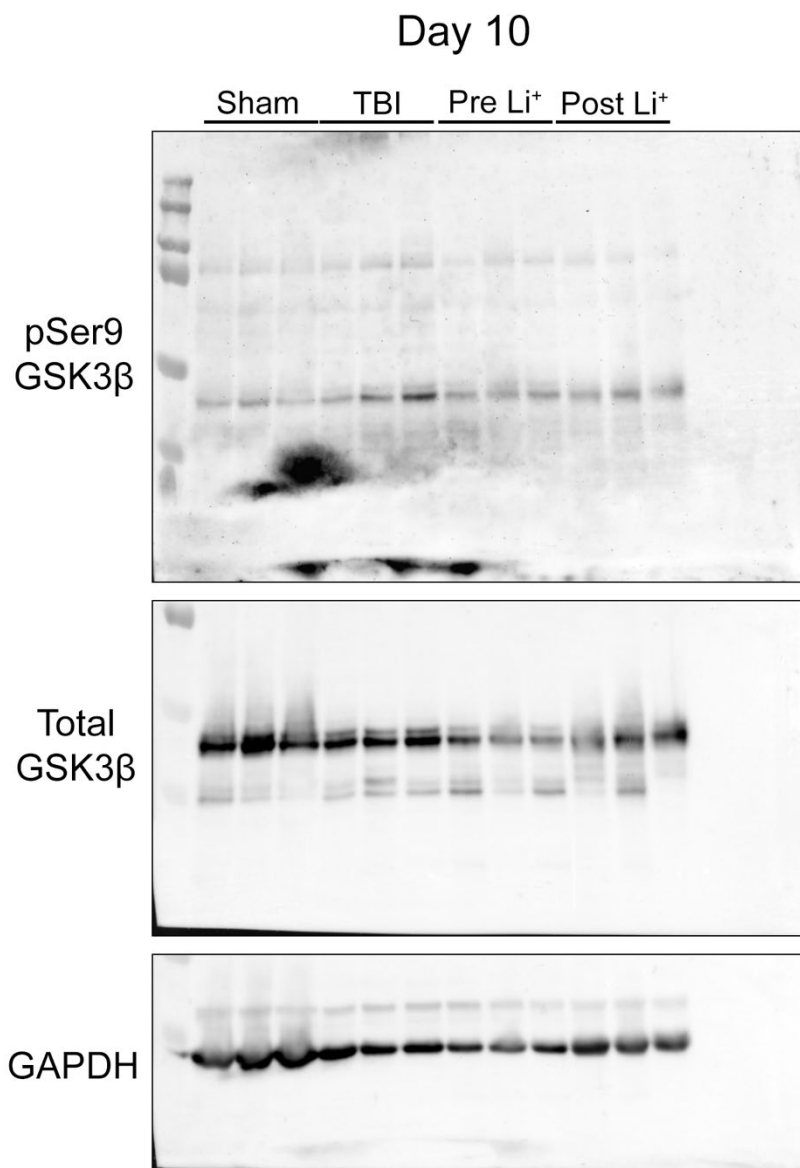

**Supplemental Material 1** Raw uncropped immunoblot of rodent brain lysates from sham, TBI, TBI + Pre Li<sup>+</sup>, and TBI + Post Li<sup>+</sup> subjects at day 10 probed for pSer9 GSK3 $\beta$  and re-probed for Total GSK3 $\beta$  and GAPDH.

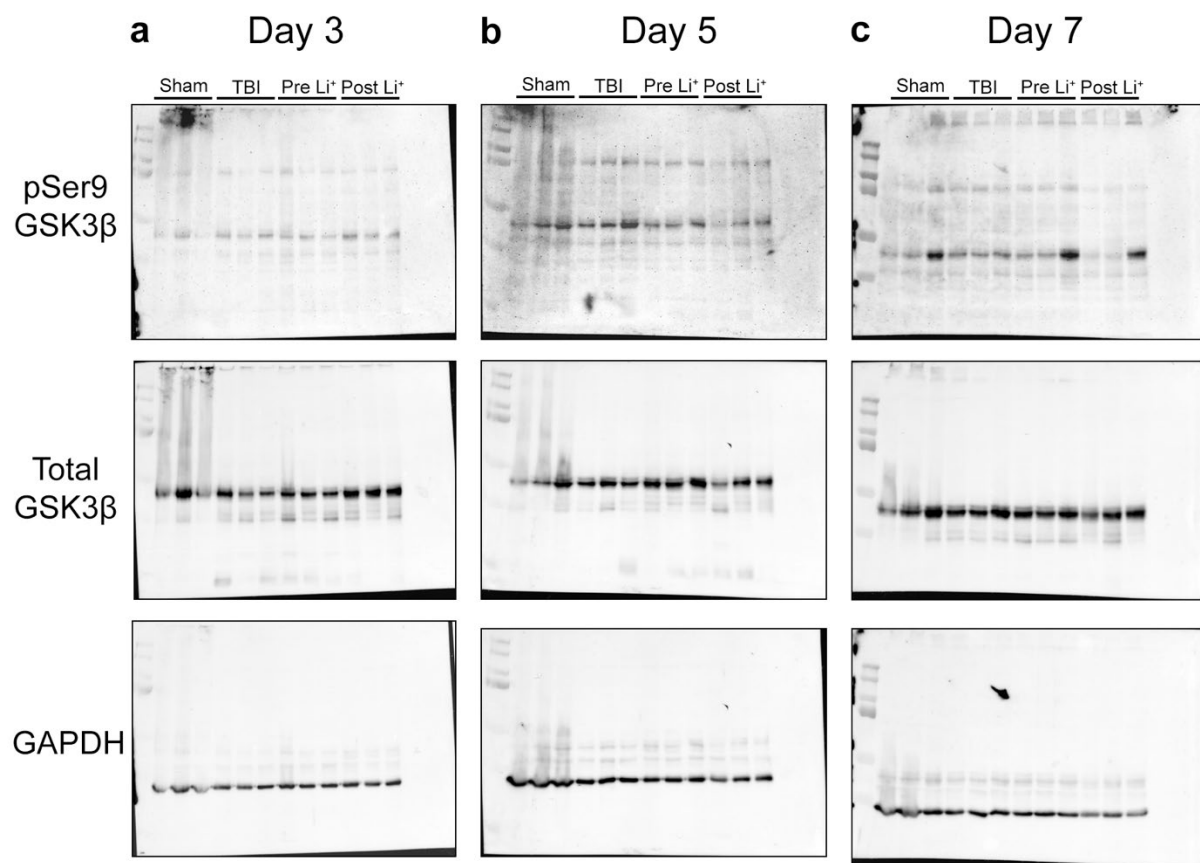

**Supplemental Material 2** Raw uncropped immunoblot of rodent brain lysates from sham, TBI, TBI + Pre Li<sup>+</sup>, and TBI + Post Li<sup>+</sup> subjects at (a) day 3, (b) day 5, and (c) day 7 probed for pSer9 GSK3β and re-probed for Total GSK3β and GAPDH.

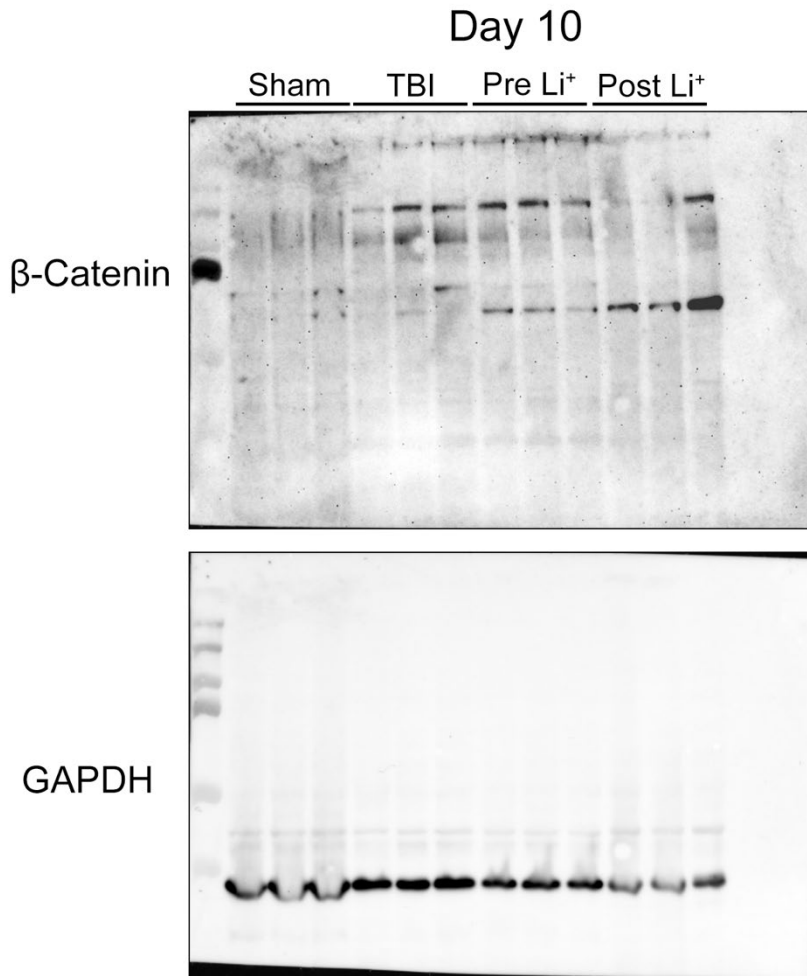

**Supplemental Material 3** Raw uncropped immunoblot of rodent brain lysates from sham, TBI, TBI + Pre Li<sup>+</sup>, and TBI + Post Li<sup>+</sup> subjects at day 10 probed for β-catenin and re-probed for GAPDH.

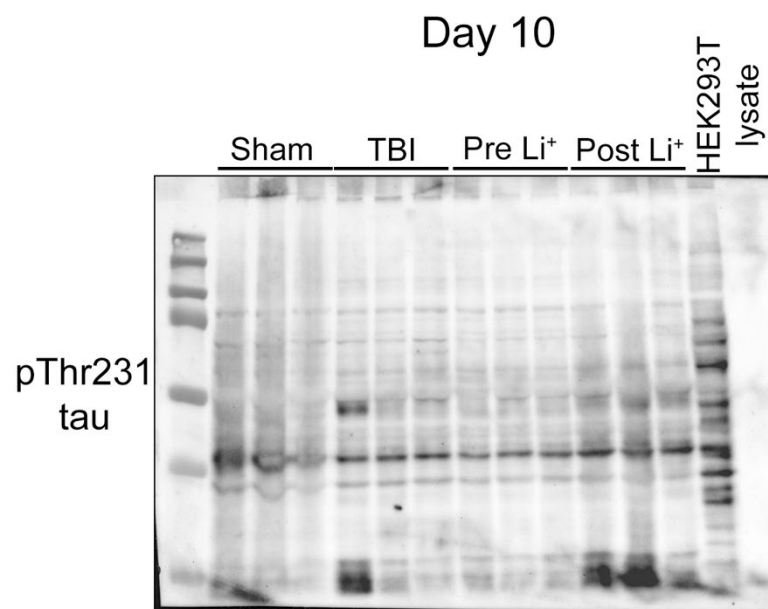

**Supplemental Material 4** Raw uncropped immunoblot of rodent brain lysates from sham, TBI, TBI + Pre Li<sup>+</sup>, and TBI + Post Li<sup>+</sup> subjects at day 10 probed for pThr231 tau.

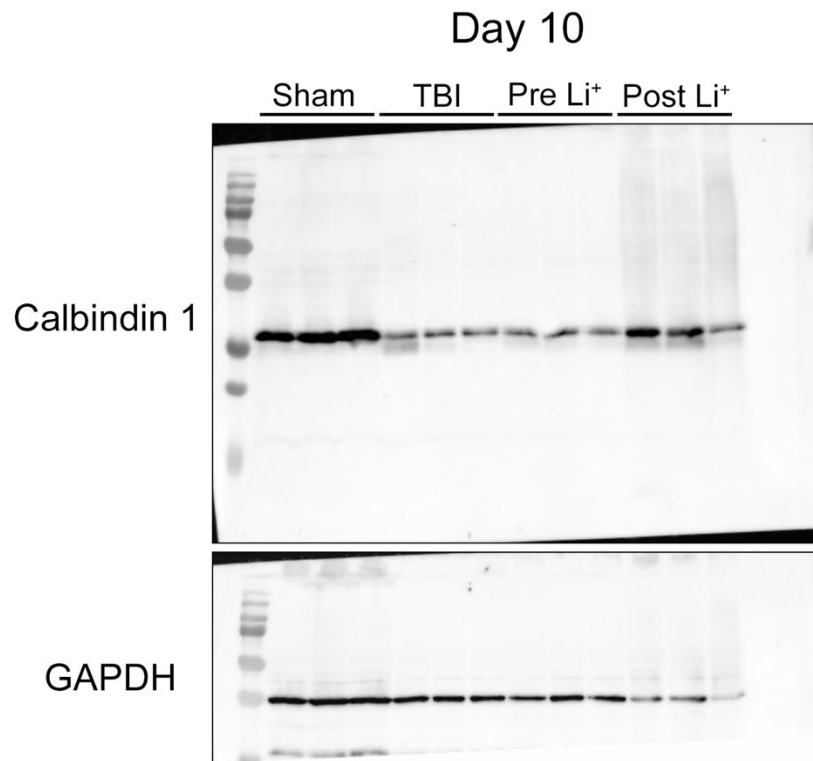

**Supplemental Material 5** Raw uncropped immunoblot of rodent brain lysates from sham, TBI, TBI + Pre Li<sup>+</sup>, and TBI + Post Li<sup>+</sup> subjects at day 10 probed for Calbindin 1 and re-probed for GAPDH.

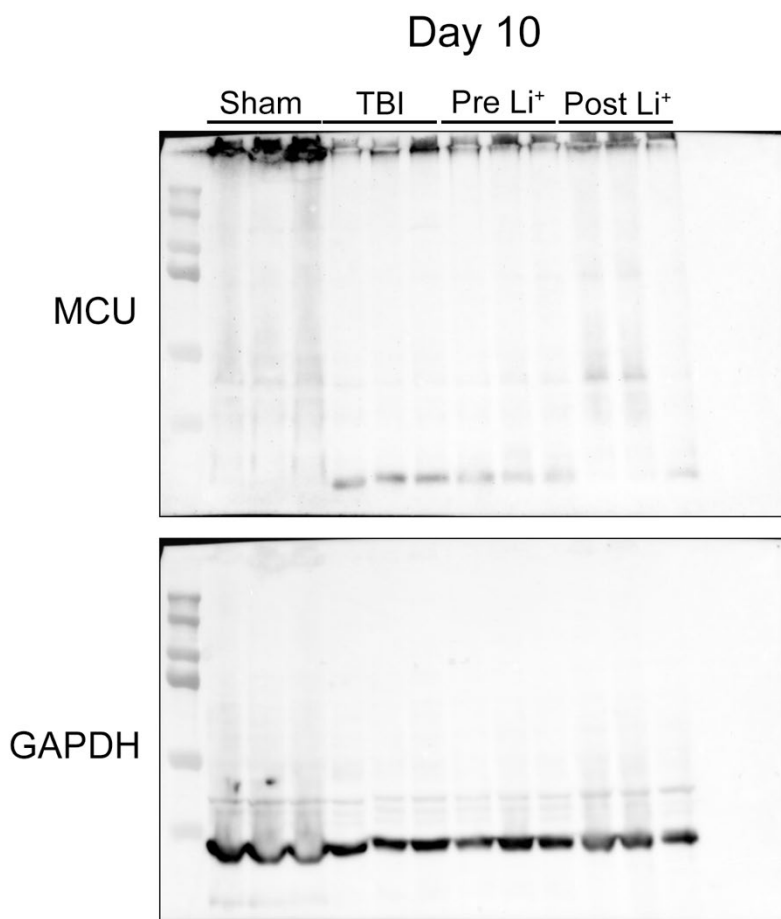

**Supplemental Material 6** Raw uncropped immunoblot of rodent brain lysates from sham, TBI, TBI + Pre Li<sup>+</sup>, and TBI + Post Li<sup>+</sup> subjects at day 10 probed for MCU and GAPDH.

Day 10

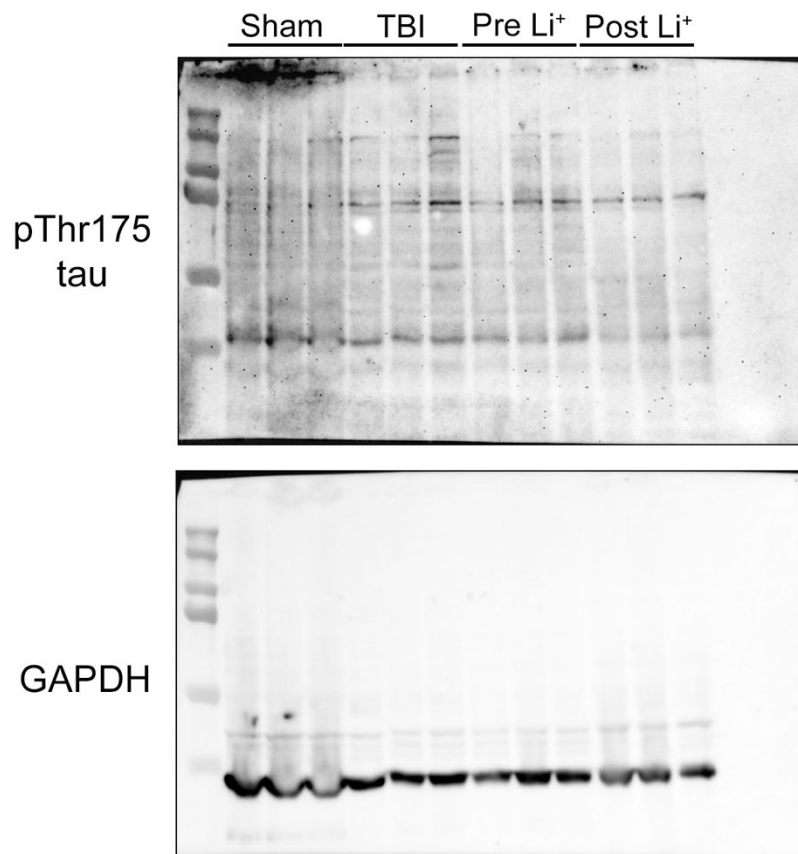

**Supplemental Material 7** Raw uncropped immunoblot of rodent brain lysates from sham, TBI, TBI + Pre Li<sup>+</sup>, and TBI + Post Li<sup>+</sup> subjects at day 10 probed for pThr175 tau and re-probed for GAPDH.
